# Supplementary material
Source: publisher site journal article supplement (https://static.cambridge.org/content/id/urn:cambridge.org:id:article:S0790966719000478/resource/name/S0790966719000478supp001.docx)
Supplement: Supplementary file 1 [file S0790966719000478supp001.docx]

| **Table 1: Mediation Induced Psychosis** | | | | | | | | | | | |
| --- | --- | --- | --- | --- | --- | --- | --- | --- | --- | --- | --- |
| SN | Study | Type of Study | Sample size | Age (Yrs.) | Gender | Meditation Type | Meditation Duration | Risk Factors | Type of Psychosis (Symptomatology) | Duration of psychosis | Affective symptoms |
| 1 | French et al., 1975 | Case report | 1 | 38 | Female | Transcendental | 2 weeks | - | Mania with psychotic symptoms | 3 months | Manic |
| 2 | Kennedy et al.,1976 | Case Report | 2 | 37  24 | Male  Male | Mindfulness  Arica Meditation | -  24 months | -  - | Psychosis (Autoscopic hallucinations)  Psychosis (Autoscopic hallucinations) | 16 months  18-24 months | Absent  Absent |
| 3 | Walsh et al., 1979 | Case series | 3 | 25  23  23 | Male  Female  Female | - | 1 week  2 weeks  4 days | Total silence, lack of sleep, past history of schizophrenic episodes  Lack of sleep and food, past history of schizophrenic episodes  Past history of Schizophrenia | Acute Psychosis  Acute Psychosis (Delusion)  Acute Psychosis (Bizarre behavior) | -  4 days  - | Absent  Absent  Suicide Attempt |
| 4 | Vanderkooi et al., 1997 | Case series | 3 | -  -  - | Female  Female  Female | Zen  Theraveda  Mindfulness | 7 days  10 days  weekend | -  -  Family history and past history of psychosis and poor compliance to medication | Schizophrenia (Hallucination with delusion)  Hallucination  Schizophrenia (Hallucination, delusion) | Few Years  Years  - | Absent  Absent  Absent |
| 5 | Chan-Ob and Boonyanaruthee 1999 | Case reports | 3 | 25  35  28 | Female  Male  Female | Meditation “Intensive course”  Walking meditation  NA | 7 days  3 days  10 days | Sleep loss, past history of depression  Sleep loss  Poor compliance to medication Known case of Schizophrenia | Acute Psychosis (Visual hallucination, Delusion of persecution)  Acute Psychosis (Hallucination, Delusion of grandiosity)  Schizophrenia (Hallucination, delusion of persecution, loosening of association) | 1 week  3 weeks  2 yrs. | Absent  Absent  Absent |
| 6 | Shan, 2000 | Case report | 1 | 44 | Male | Qi-gong | Several days | - | Acute Psychosis | - | Absent |
| 7 | Yorston et al., 2001 | Case report | 1 | 25 | Female | Zen | 2 months | Insomnia | Mania with psychotic symptoms (Delusion of grandiosity) | - | Manic |
| 8 | Sethi et al., 2003 | Case reports | 2 | 20  30 | Male  Male | -  - | 4 days  6 days | Fasting, sleep deprivation  Past history of similar two episodes | Schizophrenia (Delusion of persecution, reference and auditory hallucination)  Schizophrenia (Bizarre religious delusions) | -  - | Absent  Absent |
| 9 | Kuijpers et al, 2007 | Case report | 1 | 24 | Male | Hindustan type | - | Work related stress, relationship problem, History of BPAD | Acute Psychosis (Visual Hallucinations and Delusions) | - | Absent |
| 10 | Jessica et al., 2007 | Case report | 1 | 33 | Male | Bikram Yoga | Several days | - | Acute Psychosis (Delusions) | 1 month | Absent |
| 11 | Lim and Lin, 2007 | Case report | 1 | 57 | Male | Qi-gong | Several days | - | Schizophreniform disorder  (Auditory Hallucination and delusions) | 2 months | absent |
| 12 | Hwang, 2007 | Case report | 1 | 48 | Female | Qi-gong | 2 years | Past history of recurrent depression and multiple stressors | Brief Psychotic disorder (Delusion of grandiosity) | 3 days | Depression after psychosis subsided |
| 13 | Nakaya and Ohmori, 2010 | Case report | 1 | 30 | Male | Chanting Buddhism sutras | - | Insomnia, financial stressors | Brief Psychotic disorder (visual Hallucination) | Brief episodes (seconds to hours) | Absent |
| 14 | Julia García-Albea, et al., 2012 | Case reports | 2 | 28  18 | Female  Male | Sessions of exorcism and spiritualism  Reiki | 8 sessions  8 months | None  Consumed ayahuasca | Schizophrenia  Acute Psychosis (disorganized behavior, thought blockage) | 8 months  3 days | Absent  Absent |
| 15 | Sadzio et al., 2014 | Case Report | 1 | 46 | Female | Pranic Healing | Several years | - | Schizoaffective (Thought block) | - | Depressive |
| 16 | Mures et al., 2016 | Case report | 1 | - | Female | Bikram yoga | - | - | Acute Transient Psychotic disorder (polymorphic symptoms) | - | - |
| 17 | Sharma et al., 2016 | Case report | 1 | 27 | Male | Transcendental meditation | 1 year | Schizoid traits | Schizophrenia (Auditory hallucination, Made volition) | 6 months | Absent |
| 18 | Sherril et al., 2017 | Case report | 1 | 28 | Female | Diffuse meditation and deity yoga | - | - | Mania with psychotic symptoms (Visual and auditory hallucination) | - | Mania |
| 19 | Prakash et al, 2018 | Case report | 1 | 31 | Male | Meditation camp | 6 days | - | Acute Transient Psychotic Disorder (Delusion of reference, delusion of persecution and auditory hallucination) | 1 week | Absent |
